# Supplementary material
Source: PubMed Central journal article supplement (PMC4842952)
Supplement: Supp_Table1.pdf [file Supp_Table1.pdf]

## Supplementary Data

**Supplementary Table S1.** Primers for cloning of pIR-VP1in-AAV5-cap-hr2, or for quantitative analysis of rAAV vector preparations

| Primer               | 5'-sequence-3'                                                            |
|----------------------|---------------------------------------------------------------------------|
| AAV5-VP1- intron Fwd | 5'-AATTAAGGATCCGCCACCATGTCTTTTGTGATCACCTCCAGGTAAGTACTCCCTATCAGTGATAGAG-3' |
| AAV5-VP1- intron Rev | 5'-ATTACTGCAGGCTCTTCGAATCTGAACAATAGGAAGGGAGTGG-3'                         |
| AAV5-VP2/3-Fwd       | 5'-AATTAAGAATTCGCTCTTCGATTGGTTGGAAGAAGTTGGTGAAGG-3'                       |
| pDP-Rev              | 5'-AATTAATGATCAGATACATTGATGAGTTTGGAC-3'                                   |
| Bga-1                | 5'-CTAGAGCTCGCTGATCAGCC-3'                                                |
| Bga-2                | 5'-TGTCITCCAATCCTCCCC-3'                                                  |
| Rep-Fwd              | 5'-AGAAGGAATGGGAGTTGCCG-3'                                                |
| Rep-Rev              | 5'-TCTGACTCAGGAAACGTCCC-3'                                                |
| Cap5-Fwd             | 5'-GTTGGAAGAAGTTGGTGAAGG-3'                                               |
| Cap5-Rev             | 5'-GTACGAGATGTCGTGCTCTC-3'                                                |
| Bsd-Fwd              | 5'-AAGACTACAGCGTCGCCAGC-3'                                                |
| Bsd-Rev              | 5'-CCAGGATGCAGATCGAGAAG-3'                                                |
| Hr2-Fwd              | 5'-GCGATCGGAAATGAGAACAG-3'                                                |
| Hr2-Rev              | 5'-GGCAATTATTCCGCAATCAC-3'                                                |
